# Supplementary material for: Pattern recognition of solid materials by multiple probe gases
Source: Royal Society of Chemistry journal article supplement (doi:10.1039/c8mh01169a), 2018-12-19
Supplement: c8mh01169a1.pdf [file c8mh01169a1.pdf]

*Electronic Supplementary Information*

**Pattern Recognition of Solid Materials by Multiple Probe Gases**

Kosuke Minami,<sup>\*a,b</sup> Gaku Imamura,<sup>a,b</sup> Takahiro Nemoto,<sup>a</sup> Kota Shiba<sup>a,b</sup> Genki Yoshikawa<sup>a,b,v</sup>

- <sup>a.</sup> Center for Functional Sensor & Actuator (CFSN), National Institute for Materials Science (NIMS), 1-1 Namiki, Tsukuba, Ibaraki 305-0044, Japan.
- <sup>b.</sup> International Center for Materials Nanoarchitectonics (MANA), National Institute for Materials Science (NIMS), 1-1 Namiki, Tsukuba 305-0044, Japan
- <sup>c.</sup> Materials Science and Engineering, Graduate School of Pure and Applied Science, University of Tsukuba, Tennodai 1-1-1 Tsukuba, Ibaraki 305-8571, Japan
- <sup>\*</sup> To whom correspondence should be addressed. E-mail: MINAMI.Kosuke@nims.go.jp (K. M.),

## **Supplementary Text**

**Selection of solid materials.** In general, discrimination of chemically different targets by means of the pattern recognition approaches is rather easy, such as discrimination between hydrophobic and hydrophilic materials. Thus, as a proof-of-concept, we selected practically difficult sets of materials in terms of hydrophobic polymers as well as the different molecular weight of polymers in this present study.

## Supplementary Figures

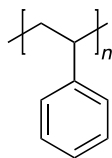

**PS**, polystyrene

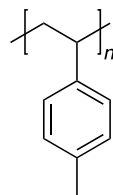

**P4MS**, poly(4-methylstyrene)

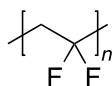

**PVF**, poly(vinylidene fluoride)

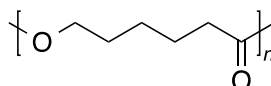

**PCL**, polycaprolactone

**Fig. S1** Structures of polymer materials used in this study.

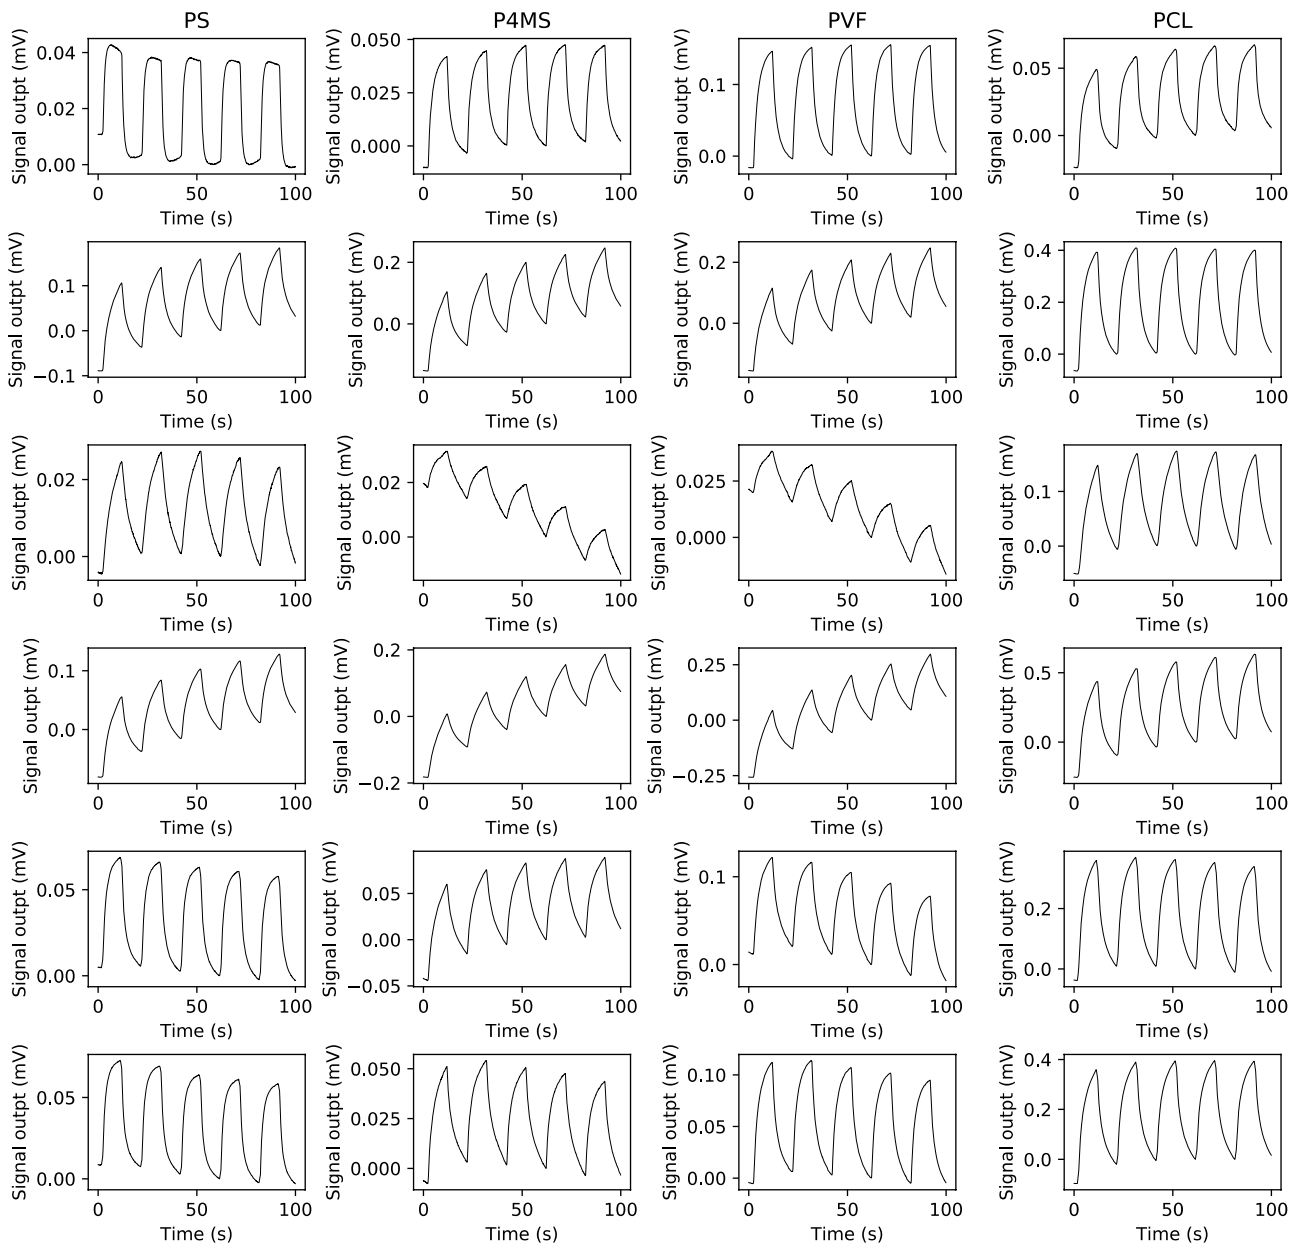

**Fig. S2** Signal responses of each material measured with 12 different vapours. Top to bottom figures indicate the response to water, ethanol, 1-hexanol, hexanal, *n*-heptane, and methylcyclohexane, respectively.

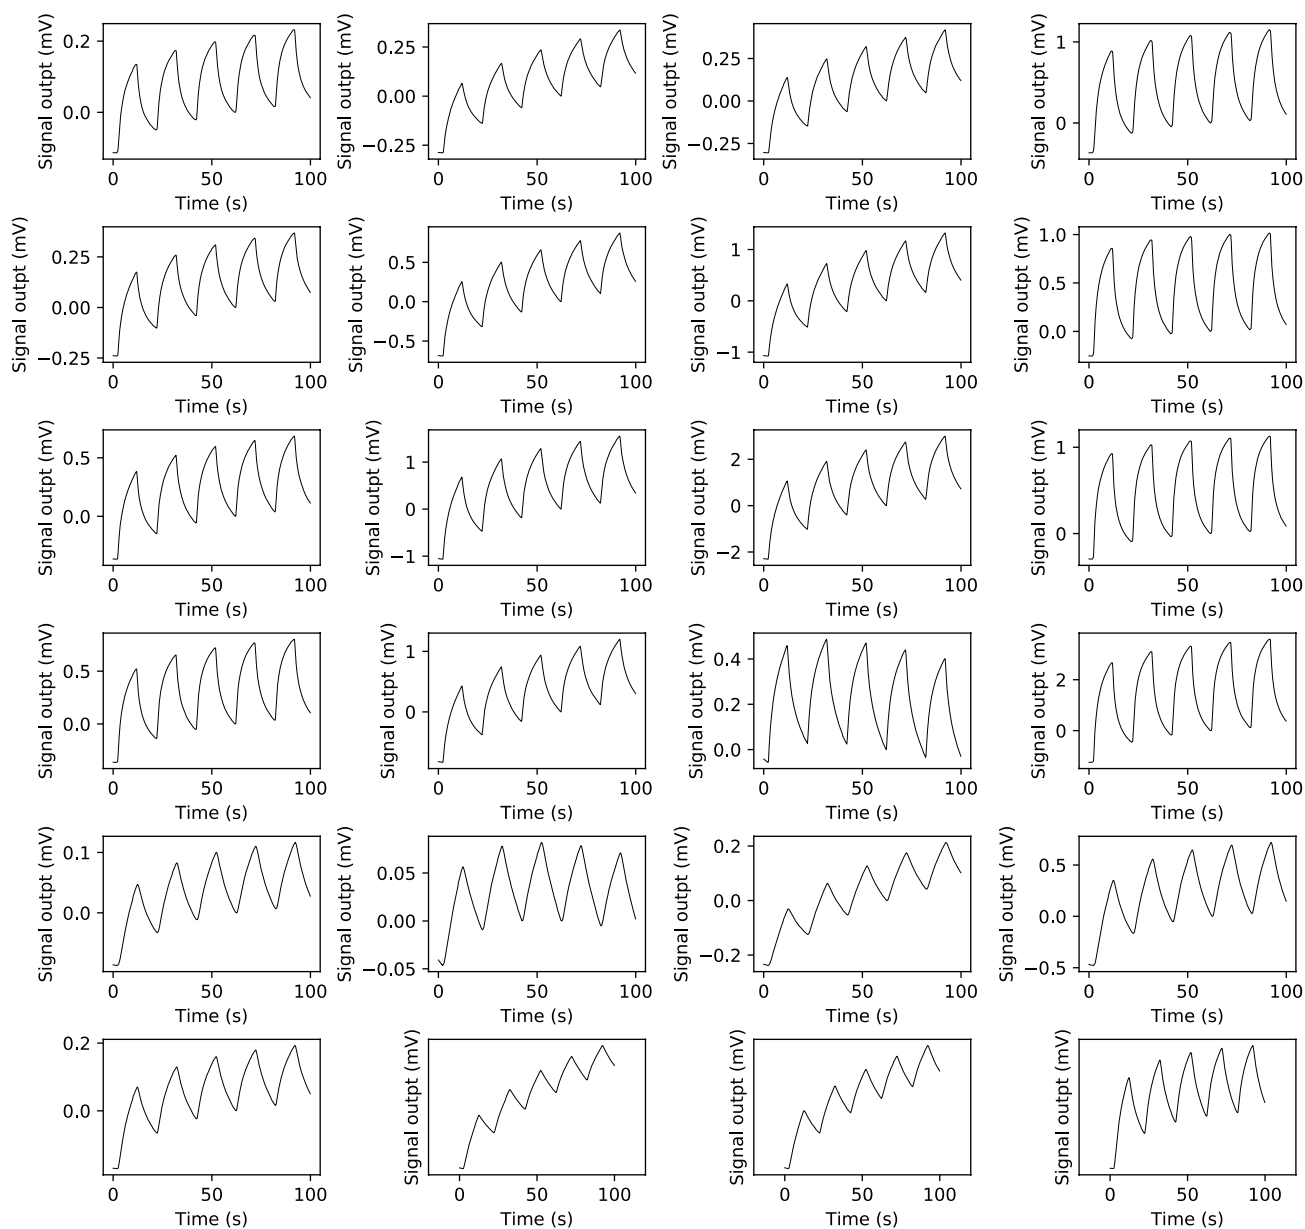

**Fig. S2 (Continued)** Signal responses of each material measured with 12 different vapours. Top to bottom figures indicate the response to toluene, ethyl acetate, acetone, chloroform, aniline and propionic acid, respectively.

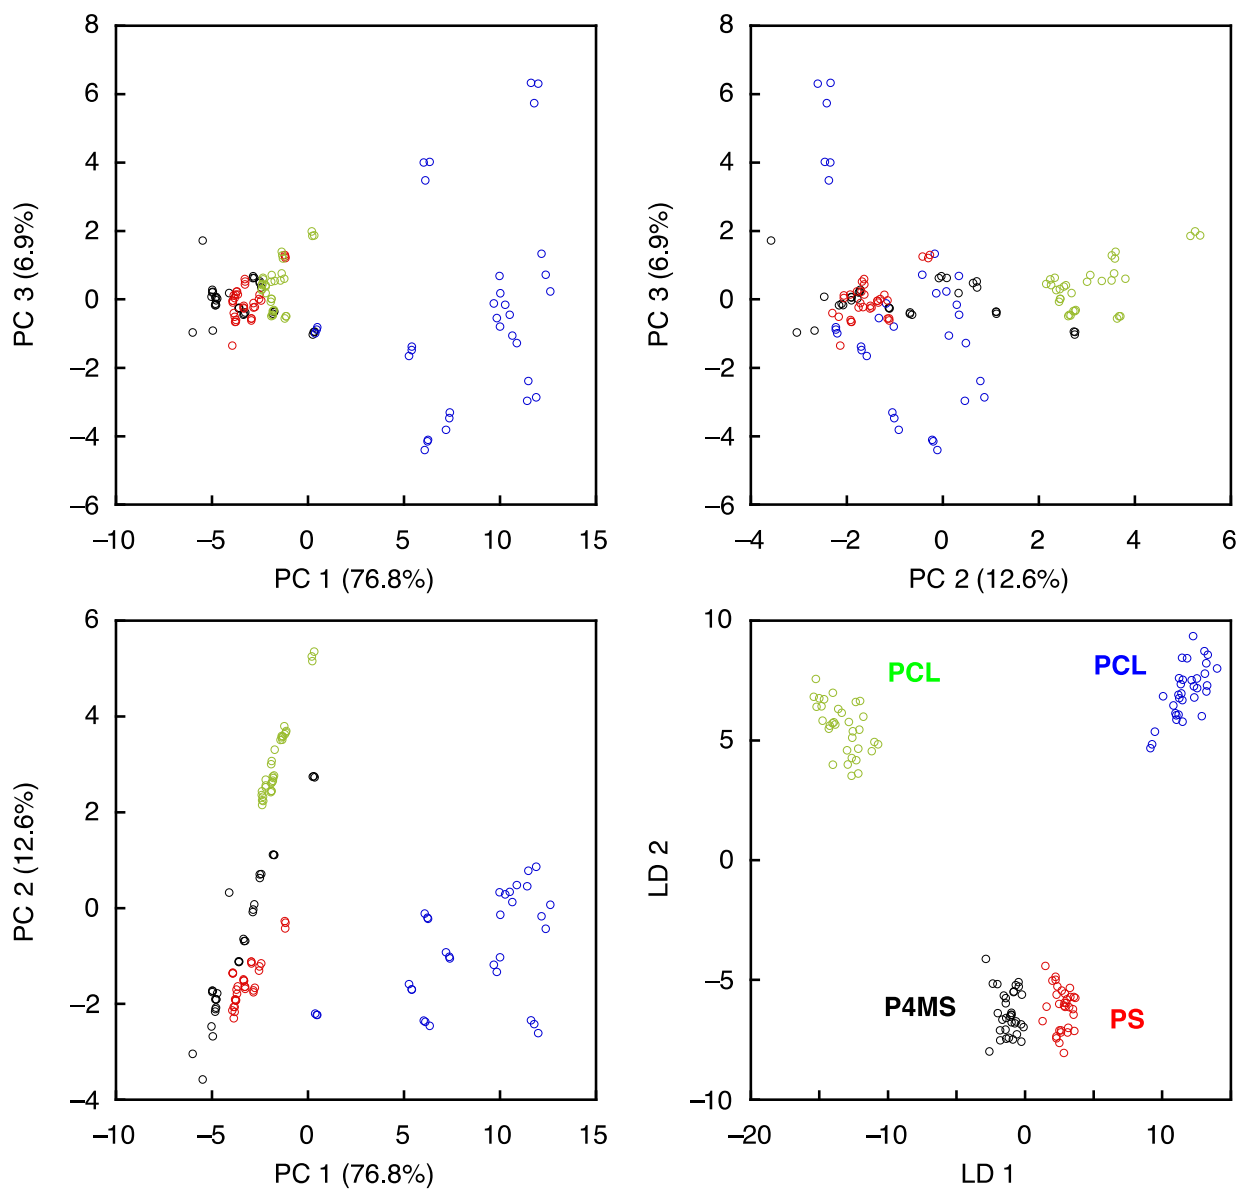

**Fig. S3** Identification of polymers by pattern recognition. PCA (*Top left, Top right, Bottom left*) and LDA (*Bottom right*) score plots to identify 4 materials coated on MSS by measuring with 12 different vapours. **PS (350k)**, polystyrene (red); **P4MS**, poly(4-methylstyrene) (black); **PVF**, poly(vinylidene fluoride) (green); **PCL**, polycaprolactone (blue).  $N = 11$ .

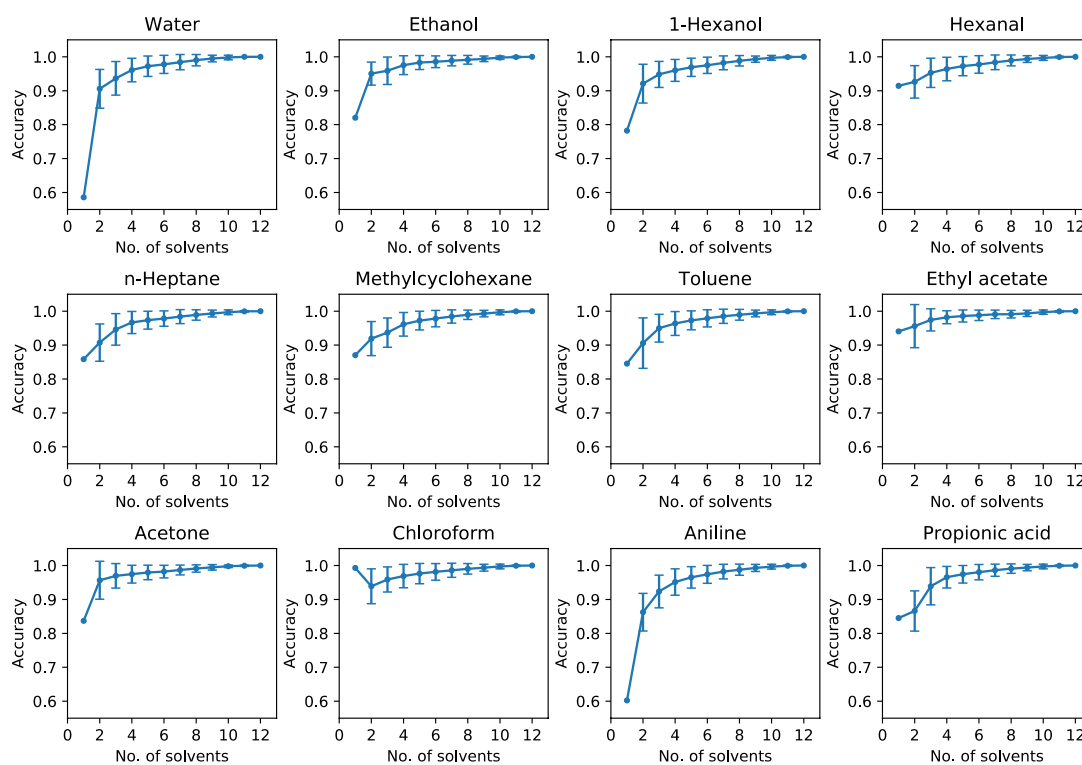

**Fig. S4** Classification accuracy of polymer materials of selected combinations including selected solvents as a function of number of solvents ( $n$ ). Average classification accuracies with standard deviations are shown.

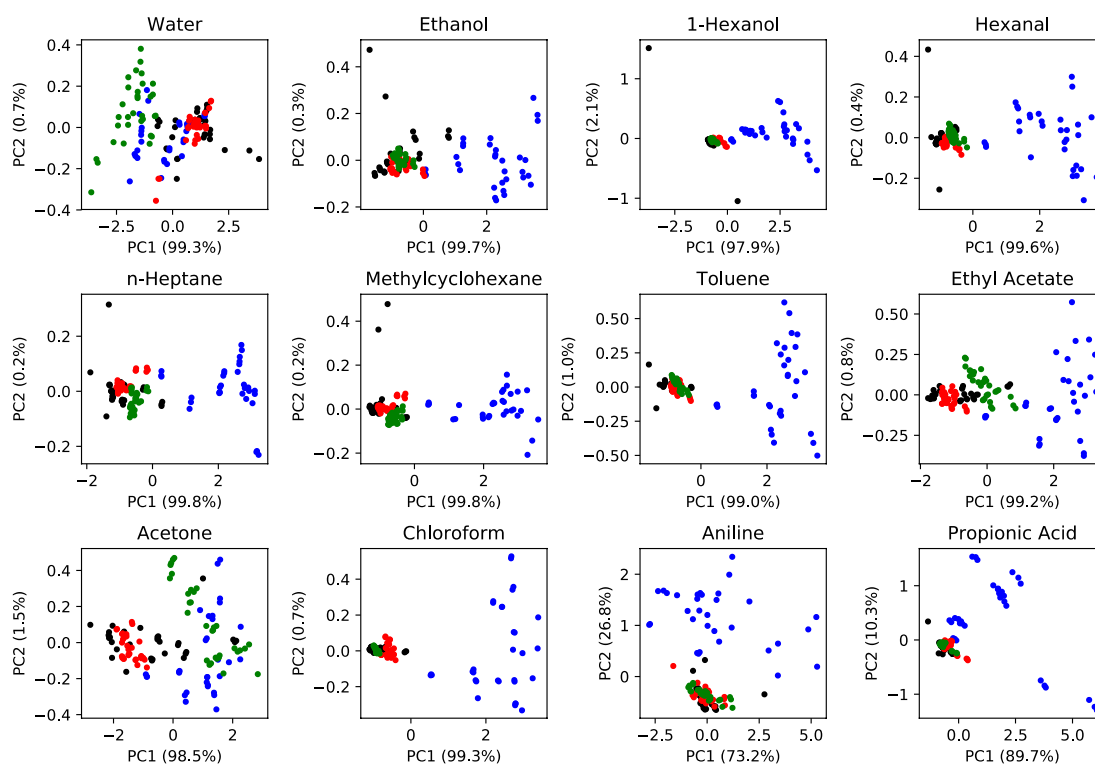

**Fig. S5** PCA score plots of features from each solvent to discriminate 4 different polymer materials. **PS (350k)**, polystyrene (red); **P4MS**, poly(4-methylstyrene) (black); **PVF**, poly(vinylidene fluoride) (green); **PCL**, polycaprolactone (blue).  $N = 11$ .



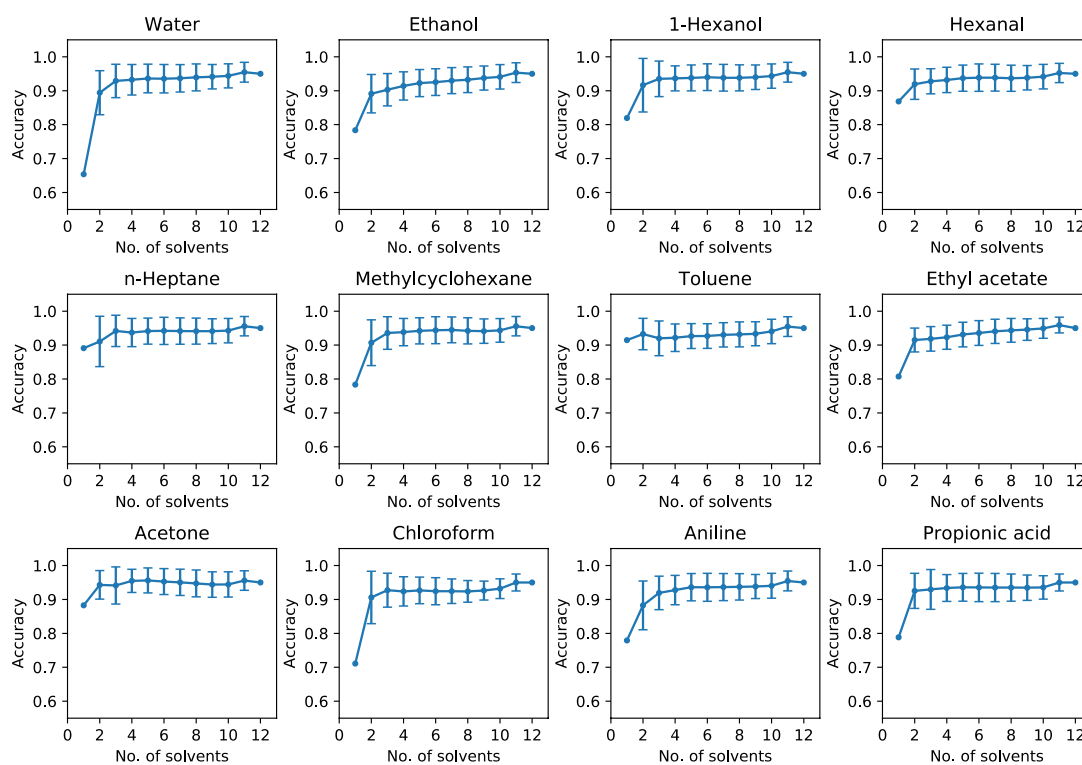

**Fig. S6** Classification accuracy of different molecular weight of selected combinations including selected solvents as a function of number of solvents ( $n$ ). Average classification accuracies with standard deviations are shown.

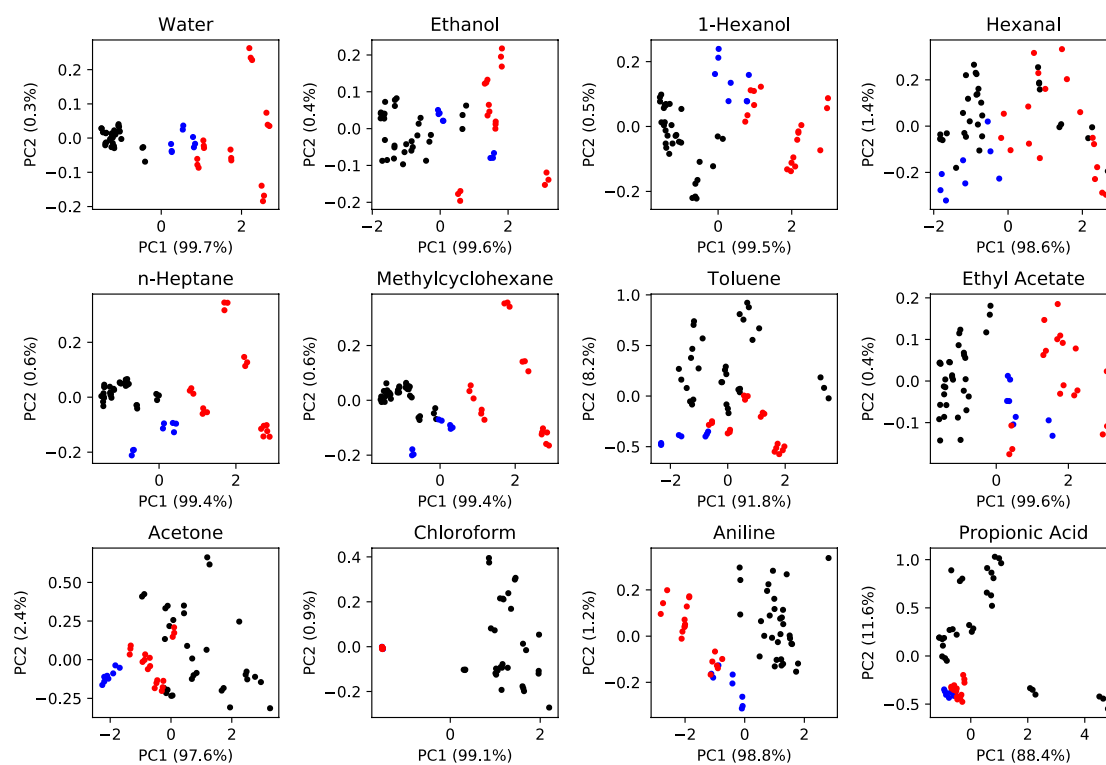

**Fig. S7** PCA score plots of features from each solvent to discriminate 4 different polymer materials. **PS (350k)**, polystyrene, Mw = 350000 (blue); **P4MS**, poly(4-methylstyrene), Mw = 72000 (black); **PS (280k)**, polystyrene, Mw = 280000 (red); **PS (35k)**, polystyrene, Mw = 35000 (green).

PVF

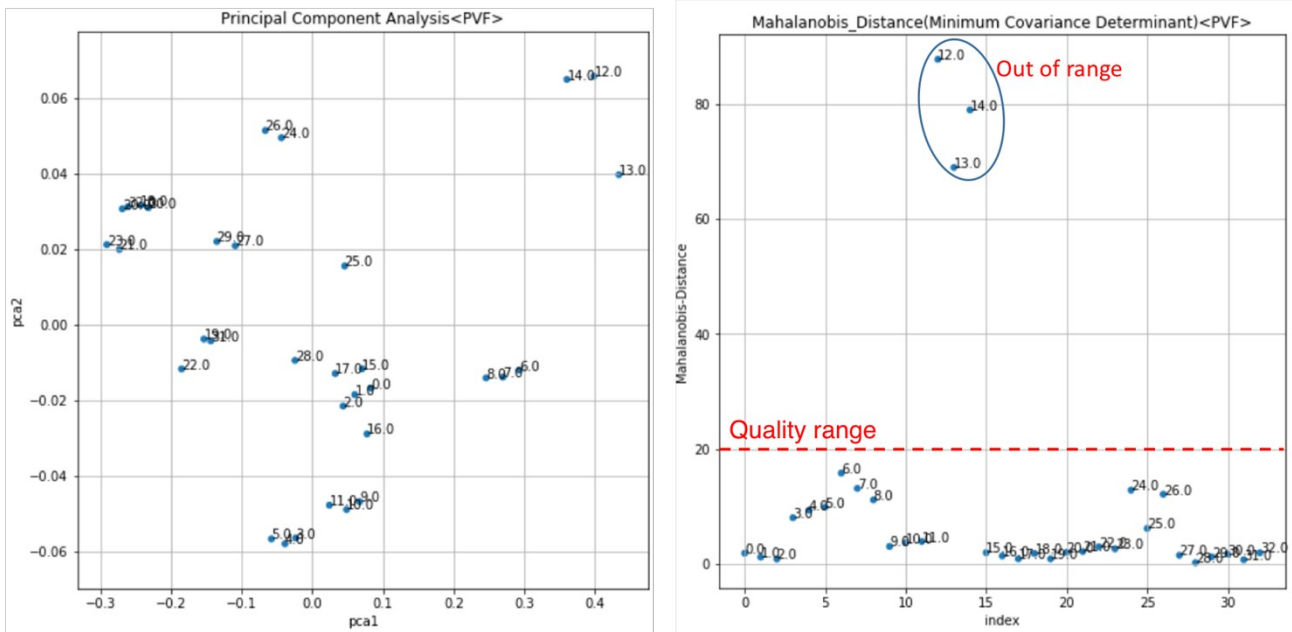

**Fig. S8** PCA score plots of polyvinylfluoride (PVF) (left) and their Mahalanobis distances (right). Red dashed line is an example of the range for determination of quality.

PCL

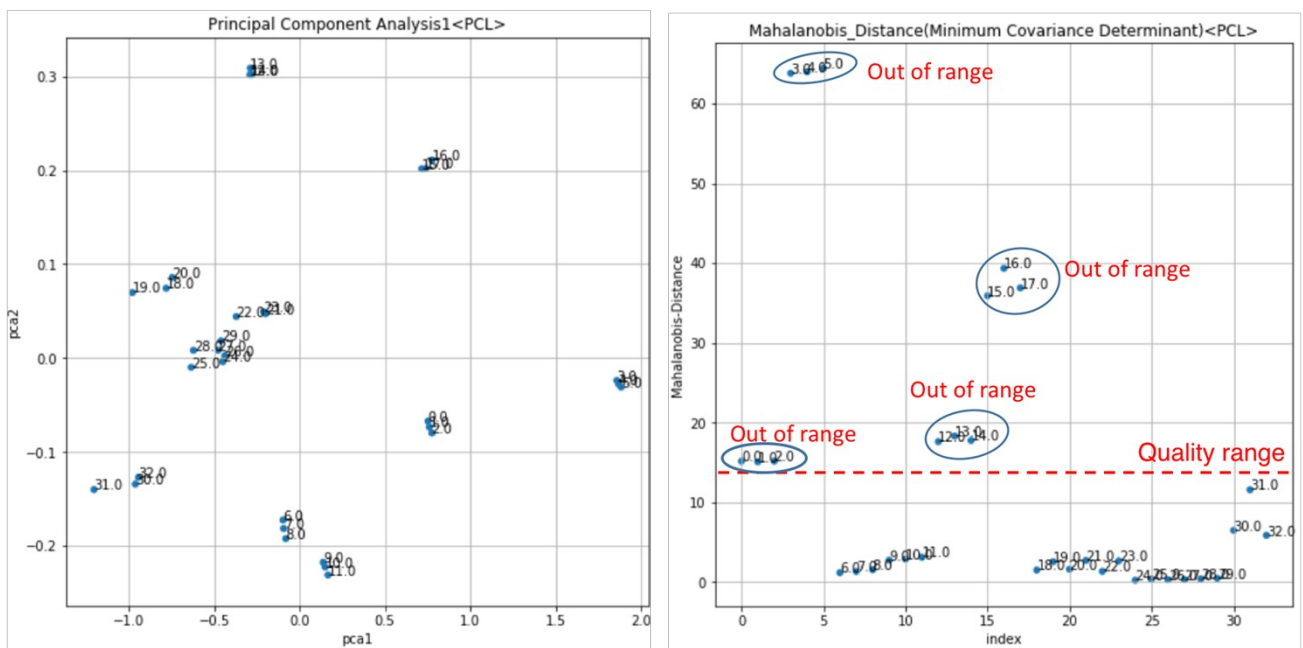

**Fig. S9** PCA score plots of polycaprolactone (PCL) (left) and their Mahalanobis distances (right). Red dashed line is an example of the range for determination of quality.
